# Supplementary material
Source: HighWire-hosted journal article supplement (http://www.ajnr.org/highwire/filestream/52288/field_highwire_adjunct_files/0/2730_table.pdf)
Supplement: 2730_table.pdf [file 2730_table.pdf]

**On-line Table: Assessment of published imaging in cases of tSCH**

| Cases                                         | Herniation Point | EDF            | HNP            | Osteophyte |
|-----------------------------------------------|------------------|----------------|----------------|------------|
| Aizawa et al 2001 case 1 <sup>21</sup>        | Disk             | —              | —              | —          |
| Aizawa et al 2001 case 3 <sup>21</sup>        | Disk             | Y              | —              | —          |
| Barbagallo et al 2002 case 1 <sup>11</sup>    | Not Disk         | —              | —              | —          |
| Barbagallo et al 2002 case 2 <sup>11</sup>    | Not Disk         | N              | N              | N          |
| Barrenechea et al 2006 case 5 <sup>24</sup>   | Disk             | N              | N              | N          |
| Barrenechea et al 2006 case 7 <sup>24</sup>   | Not Disk         | N              | Y              | N          |
| Bartholomei et al 2000 <sup>25</sup>          | Disk             | Y              | N              | N          |
| Baur et al 1997 case 3 <sup>26</sup>          | Not Disk         | N              | N              | N          |
| Borges et al 1995 case 1 <sup>4</sup>         | Not Disk         | N              | N              | N          |
| Borges et al 1995 case 2 <sup>4</sup>         | Disk             | —              | —              | —          |
| Borges et al 1995 case 3 <sup>4</sup>         | Not Disk         | N              | N              | N          |
| Brugieres et al 1999 case 1 <sup>12</sup>     | Disk             | Y              | N              | N          |
| Brugieres et al 1999 case 2 <sup>12</sup>     | Disk             | N              | N              | N          |
| Cellerini et al 2002 case 1 <sup>22</sup>     | Disk             | —              | —              | —          |
| Cellerini et al 2002 case 2 <sup>22</sup>     | Disk             | —              | —              | —          |
| Dix et al 1998 <sup>27</sup>                  | Disk             | Y              | Y              | Y          |
| Ewald et al 2000 <sup>5</sup>                 | Disk             | N              | N              | Y          |
| Ghostine et al 2009 <sup>2</sup>              | Disk             | —              | —              | —          |
| Hausmann and Mosely 1996 case 1 <sup>13</sup> | Disk             | N              | N              | Y          |
| Hausmann and Mosely 1996 case 2 <sup>13</sup> | Disk             | N              | N              | N          |
| Hausmann and Mosely 1996 case 3 <sup>13</sup> | Disk             | N              | N              | N          |
| Hausmann and Mosely 1996 case 4 <sup>13</sup> | Not Disk         | N              | N              | Y          |
| Henry et al 1997 <sup>28</sup>                | Not Disk         | N              | Y              | N          |
| Isu et al 1991 case 1 <sup>29</sup>           | Disk             | N              | N              | N          |
| Isu et al 1991 case 2 <sup>29</sup>           | Disk             | —              | —              | N          |
| Karadeniz-Bilgili et al 2005 <sup>30</sup>    | Disk             | —              | —              | —          |
| Kawachi et al 2001 <sup>31</sup>              | Disk             | N              | N              | N          |
| Kumar et al 1995 <sup>9</sup>                 | Disk             | N              | N              | N          |
| Maira et al 2006 case 1 <sup>32</sup>         | Not Disk         | N              | N              | N          |
| Maira et al 2006 case 2 <sup>32</sup>         | Not Disk         | N              | Y              | Y          |
| Maira et al 2006 case 4 <sup>32</sup>         | Disk             | —              | —              | —          |
| Maira et al 2006 case 5 <sup>32</sup>         | Disk             | N              | N              | N          |
| Marshman et al 1999 <sup>33</sup>             | Disk             | Y              | Y              | N          |
| Massicotte et al 2002 case 1 <sup>34</sup>    | Not Disk         | N              | Y              | N          |
| Massicotte et al 2002 case 2 <sup>34</sup>    | Not Disk         | —              | —              | —          |
| Massicotte et al 2002 case 4 <sup>34</sup>    | —                | Y <sup>a</sup> | —              | —          |
| Massicotte et al 2002 case 5 <sup>34</sup>    | Disk             | —              | —              | —          |
| Masuzawa et al 1981 <sup>6</sup>              | Not Disk         | N              | N              | N          |
| Miura et al 1996 <sup>35</sup>                | Disk             | Y              | N              | Y          |
| Miyaguchi et al 2001 <sup>14</sup>            | Disk             | N              | Y <sup>b</sup> | N          |
| Miyake et al 1998 case 1 <sup>7</sup>         | Disk             | —              | —              | —          |
| Miyake et al 1998 case 2 <sup>7</sup>         | Disk             | —              | —              | —          |
| Morokoff et al 2001 <sup>36</sup>             | Not Disk         | Y              | N              | N          |
| Najjar et al 2004 <sup>37</sup>               | Disk             | Y              | Y              | N          |
| Nakagawa et al 2003 <sup>38</sup>             | Disk             | N              | N              | N          |
| Nakazawa et al 1993 case 2 <sup>39</sup>      | Disk             | —              | —              | —          |
| Pereira et al 2001 <sup>23</sup>              | Disk             | —              | —              | —          |
| Sagiuchi et al 2003 <sup>15</sup>             | Not Disk         | N              | Y              | Y          |
| Saito et al 2004 <sup>40</sup>                | Disk             | —              | —              | —          |
| Saito et al 2006 <sup>41</sup>                | Not Disk         | —              | —              | —          |
| Sasani et al 2009 <sup>42</sup>               | Not Disk         | N              | —              | N          |
| Sasaoka et al 2003 <sup>43</sup>              | Disk             | Y              | N              | Y          |
| Sioutos et al 1996 <sup>44</sup>              | Not Disk         | N              | N              | N          |
| Slavotinek et al 1996 <sup>45</sup>           | Not Disk         | N              | N              | N          |
| Sugimoto et al 2005 <sup>10</sup>             | Disk             | Y              | Y              | Y          |
| Tekkok 2000 <sup>46</sup>                     | Disk             | N              | N              | N          |
| Tronnier et al 1991 <sup>3</sup>              | Disk             | —              | —              | —          |
| Uchino et al 1997 case 1 <sup>47</sup>        | Disk             | N              | N              | N          |
| Uchino et al 1997 case 2 <sup>47</sup>        | Disk             | Y              | N              | N          |
| Ulivieri et al 2009 <sup>48</sup>             | Not Disk         | —              | —              | —          |
| Wada et al 2000 case 1 <sup>49</sup>          | Disk             | N              | N              | Y          |
| Wada et al 2000 case 2 <sup>49</sup>          | Disk             | N              | N              | N          |
| Watters et al 1998 case 1 <sup>50</sup>       | Disk             | —              | —              | N          |
| White and Firth 1994 case 1 <sup>8</sup>      | Disk             | —              | —              | —          |
| White and Firth 1994 case 2 <sup>8</sup>      | Not Disk         | —              | —              | —          |
| White and Tsegaye 2004 case 2 <sup>51</sup>   | Disk             | —              | —              | —          |
| Wortzman et al 1974 <sup>1</sup>              | Not Disk         | —              | —              | —          |
| unpublished case 1                            | Disk             | —              | —              | Y          |
| unpublished case 2                            | Not Disk         | Y              | Y              | Y          |
| unpublished case 3                            | Disk             | —              | Y              | Y          |

**Note:** —Y indicates yes; N, No; —, unavailable or unclear.

<sup>a</sup> Per authors' written assessment of unpublished image.

<sup>b</sup> Confirmed surgically by the authors.
